# Supplementary material for: Specific zinc binding to heliorhodopsin
Source: Royal Society of Chemistry journal article supplement (doi:10.1039/d2cp04718g), 2023-01-01
Supplement: d2cp04718g1.pdf [file d2cp04718g1.pdf]

## Supporting Information:

### Specific Zinc Binding to Heliorhodopsin

Masanori Hashimoto,<sup>a</sup> Koichi Miyagawa,<sup>b</sup> Manish Singh,<sup>a</sup> Kota Katayama,<sup>a,c,d</sup>  
Mitsuo Shoji,<sup>\*,b,d</sup> Yuji Furutani,<sup>a,c</sup> Yasuteru Shigeta,<sup>b</sup> and Hideki Kandori<sup>\*,a,c</sup>

<sup>a</sup>Department of Life Science and Applied Chemistry, Nagoya Institute of Technology, Showa-ku, Nagoya 466-8555, Japan

<sup>b</sup>Center for Computational Sciences, University of Tsukuba, Tsukuba, Ibaraki 305-8577, Japan

<sup>c</sup>OptoBioTechnology Research Center, Nagoya Institute of Technology, Showa-ku, Nagoya 466-8555, Japan

<sup>d</sup>JST-PRESTO, Kawaguchi, Saitama 332-0012, Japan

\*Corresponding author: [kandori@nitech.ac.jp](mailto:kandori@nitech.ac.jp), [mshoji@ccs.tsukuba.ac.jp](mailto:mshoji@ccs.tsukuba.ac.jp)

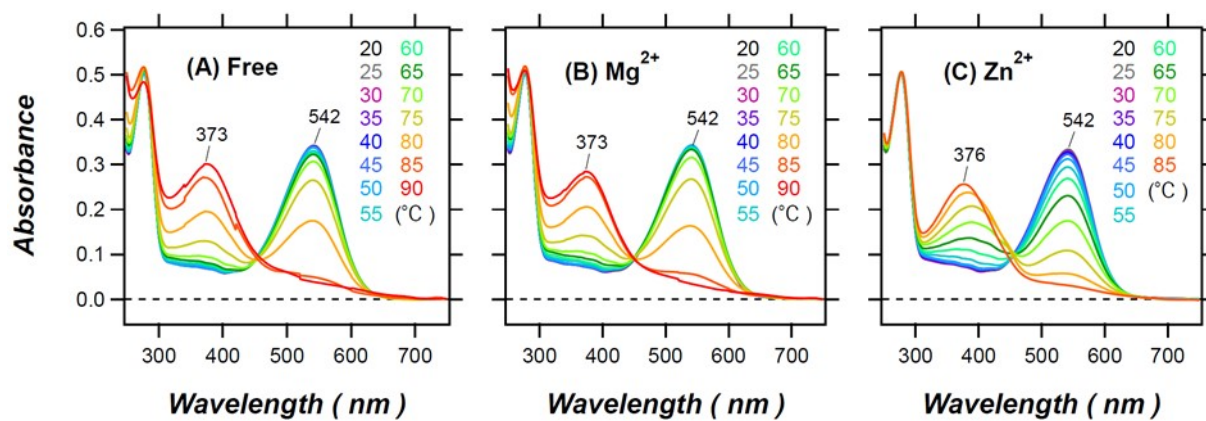

**Figure S1.** UV-visible absorption spectra of TaHeR at various temperatures (20 to 90 °C) in the absence of divalent cations (A), presence of 0.5 mM Mg<sup>2+</sup> (B), and 0.5 mM Zn<sup>2+</sup> (C).

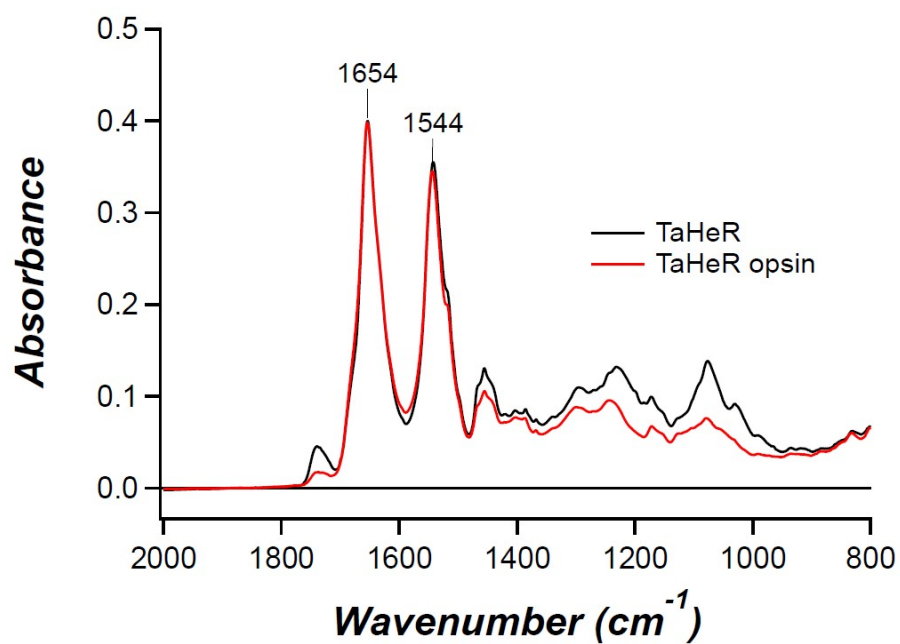

**Figure S2.** Comparison of apparent absolute absorption spectra of proteins between TaHeR (black line) and TaHeR opsin (red line) in the 2000-800 cm<sup>-1</sup> region. Each sample is naturally dried on the surface of a silicon ATR crystal after removal of detergent.

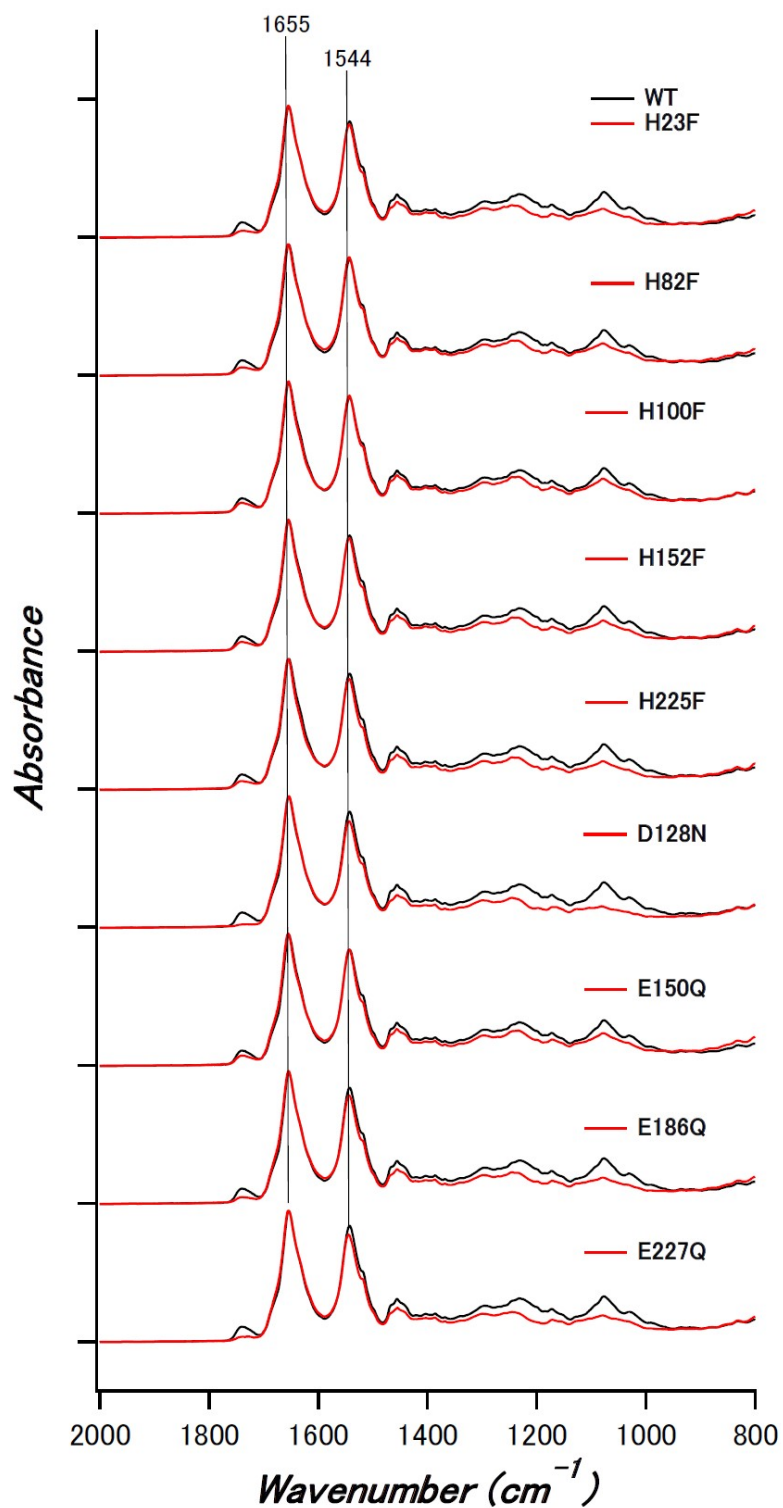

**Figure S3.** Comparison of apparent absolute absorption spectra of proteins between TaHeR (black line) and TaHeR mutants (red line) in the 2000-800  $\text{cm}^{-1}$  region. One division of the y-axis corresponds to 0.3 absorbance units. Each sample is naturally dried on the surface of a silicon ATR crystal after removal of detergent.

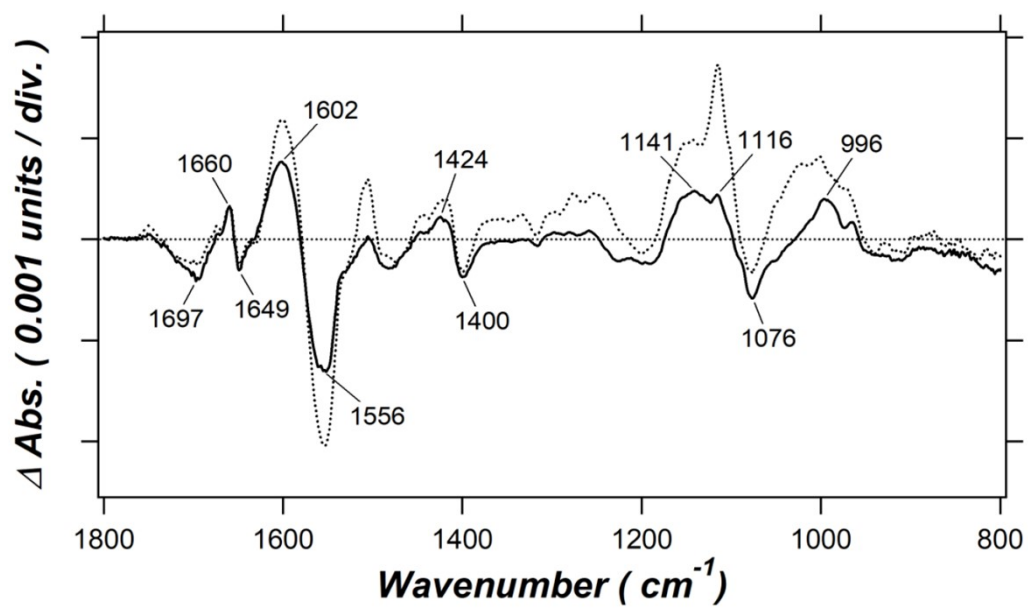

**Figure S4.** Difference ATR-FTIR spectra of TaHeR with (black dotted line) and without His-tag (black solid line). These spectra are reproduced from ref. (1).

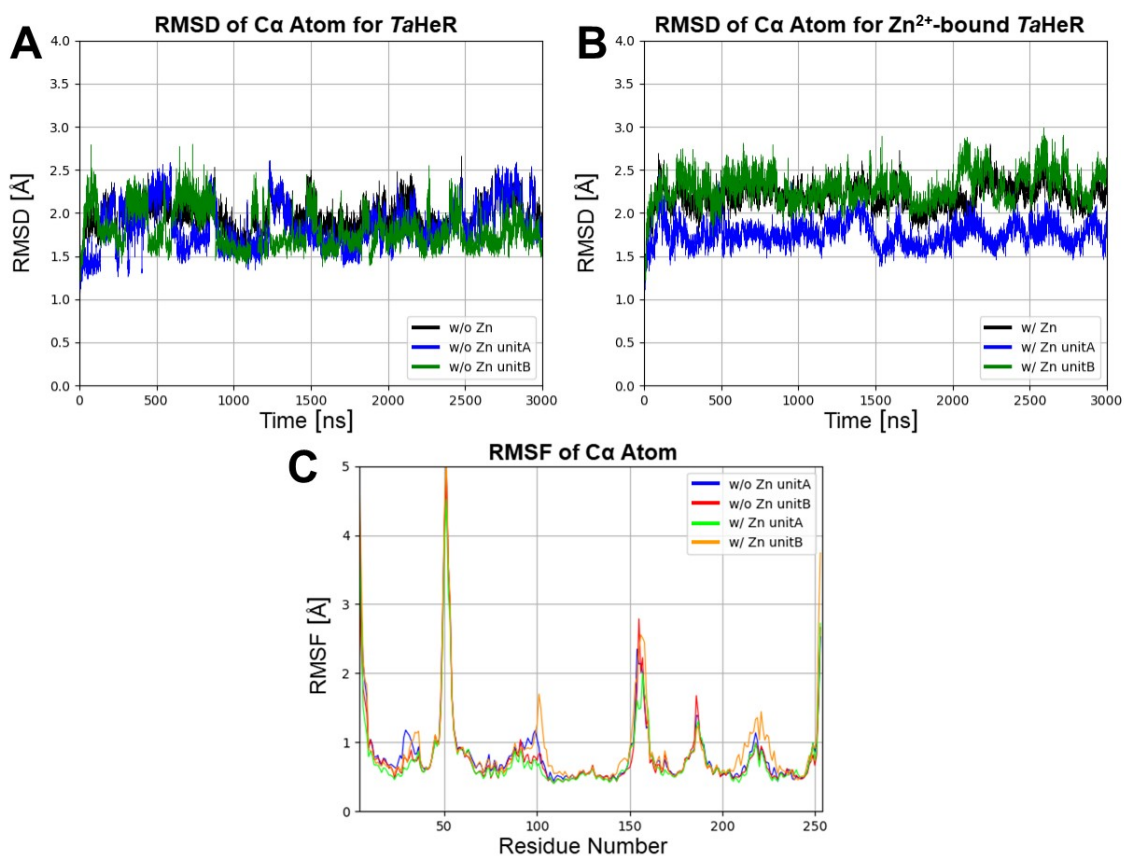

**Figure S5.** C $\alpha$  Root-mean-square deviation (RMSD) of (A) *TaHeR* and (B) Zn<sup>2+</sup>-bound *TaHeR* for 3 $\mu$ s. (C) C $\alpha$  Root-mean-square fluctuation (RMSF) of trajectories obtained by 3 $\mu$ s MD simulations. In these figures, w/o Zn means *TaHeR*, while w/ Zn does Zn<sup>2+</sup>-bound *TaHeR*.

## References

- (1) Hashimoto, M.; Katayama, K.; Furutani, Y.; Kandori, H. Zinc Binding to Heliorhodopsin. *J. Phys. Chem. Lett.* **2020**, *11*, 8604-8609.
